# Supplementary material for: Association between Meal Frequency and Type 2 Diabetes Mellitus in Rural Adults: A Large-Scale Cross-Sectional Study
Source: MDPI journal article supplement (doi:10.3390/nu15061348), 2023-03-10
Supplement: s1 [file s1]

## ELECTRONIC SUPPLEMENTARY DATA

### Title

Association between Meal Frequency and Type 2 Diabetes Mellitus in Rural Adults: A Large-Scale Cross-Sectional Study

### Authors:

Bota Baheti <sup>1,†</sup>, Xiaotian Liu <sup>1,†</sup>, Mu Wang <sup>2</sup>, Caiyun Zhang <sup>1</sup>, Xiaokang Dong <sup>1</sup>, Ning Kang <sup>1</sup>,  
Linlin Li <sup>1</sup>, Xing Li <sup>3</sup>, Songcheng Yu <sup>3</sup>, Jian Hou <sup>1</sup>, Zhenxing Mao <sup>1</sup> and Chongjian Wang <sup>1,\*</sup>

### Authors affiliations:

- <sup>1</sup> Department of Epidemiology and Biostatistics, College of Public Health, Zhengzhou University, Zhengzhou 450001, China; botabht@163.com (B.B.); xtliu2008@126.com (X.L.); z201528383@163.com (C.Z.); dong4568529173@163.com (X.D.); kangning97@163.com (N.K.); lilinlin563@163.com (L.L.); 13667176505@163.com (J.H.); maozhr@gmail.com (Z.M.)
- <sup>2</sup> Clinical Mass Spectrometry Laboratory, Clinical Research Institute, Affiliated Nanhua Hospital, Hengyang Medical College, University of South China, Hengyang 421200, China; wangmu2009@163.com
- <sup>3</sup> Department of Nutrition and Food Hygiene, College of Public Health, Zhengzhou University, Zhengzhou, China; lixing530@zzu.edu.cn (X.L.); scyu@zzu.edu.cn (S.Y.)
- \* Correspondence: tjwcj2008@zzu.edu.cn; Tel.: +86-371-6778-1452; Fax: +86-371-6778-1919
- † These authors contributed equally to this work.

**Conflict of interest:** All authors declare that they have no conflict of interest.

### Ethics approval:

Ethics approval was obtained from the “Zhengzhou University Life Science Ethics Committee”, and written informed consent was obtained for all participants. Ethic approval code: [2015] MEC (S128).

### Consent to participant

Written consent was acquired from each participant prior to this study.

**Supplemental Table S1.** Multivariate-adjusted *ORs* and *95% CI* for T2DM according to meal frequency

OR: odds ratio; CI: confidence interval

| Variables                   | OR (95% CI)      |                  |                  |
|-----------------------------|------------------|------------------|------------------|
|                             | Model 1          | Model 2          | Model 3          |
| <b>Total meal frequency</b> |                  |                  |                  |
| 21 times/week (n=26,621)    | 1.00 (Ref.)      | 1.00 (Ref.)      | 1.00 (Ref.)      |
| 14-20 times/week (n=2784)   | 0.56 (0.47-0.66) | 0.82 (0.68-0.97) | 0.73 (0.60-0.87) |
| <b>Breakfast frequency</b>  |                  |                  |                  |
| 7 times/week (n=27,359)     | 1.00 (Ref.)      | 1.00 (Ref.)      | 1.00 (Ref.)      |
| 0-6 times/week (n=2046)     | 0.54 (0.44-0.66) | 0.86 (0.69-1.05) | 0.82 (0.66-1.01) |
| <b>Lunch frequency</b>      |                  |                  |                  |
| 7 times/week (n=29,195)     | 1.00 (Ref.)      | 1.00 (Ref.)      | 1.00 (Ref.)      |
| 0-6 times/week (n=210)      | 0.80 (0.45-1.30) | 1.02 (0.57-1.67) | 0.92 (0.50-1.55) |
| <b>Dinner frequency</b>     |                  |                  |                  |
| 7 times/week (n=28,621)     | 1.00 (Ref.)      | 1.00 (Ref.)      | 1.00 (Ref.)      |
| 0-6 times/week (n=784)      | 0.57 (0.41-0.77) | 0.70 (0.50-0.95) | 0.59 (0.42-0.81) |

Model 1 was unadjusted;

Model 2 was adjusted for age and gender;

Model 3 was adjusted for age and gender, marital status, average monthly income, education level, smoking status, drinking status, physical activity, vegetable and fruit intake, high-fat diet, high-salt diet, BMI, energy intake, basal metabolic rate, family history of T2DM, weekly frequency of eating-out (total meal, breakfast, lunch, dinner).

**Supplemental Table S2.** Stratified analysis of the association between total meal frequency and T2DM

| Variables                         | Weekly total meal frequency          |                                       |                                       | <i>P</i> interaction |
|-----------------------------------|--------------------------------------|---------------------------------------|---------------------------------------|----------------------|
|                                   | 21 times/week<br>( <i>n</i> =26,621) | 16-20 times/week<br>( <i>n</i> =1440) | 14-15 times/week<br>( <i>n</i> =1344) |                      |
| <b>Gender</b>                     |                                      |                                       |                                       | 0.108                |
| Men                               | 1.00 (Ref.)                          | 0.84 (0.59-1.18)                      | 0.70 (0.47-1.00)                      |                      |
| Women                             | 1.00 (Ref.)                          | 0.65 (0.45-0.91)                      | 0.71 (0.49-0.98)                      |                      |
| <b>Age</b>                        |                                      |                                       |                                       | 0.136                |
| < 60 years                        | 1.00 (Ref.)                          | 0.85 (0.63-1.13)                      | 0.83 (0.61-1.12)                      |                      |
| ≥ 60 years                        | 1.00 (Ref.)                          | 0.75 (0.45-1.17)                      | 0.60 (0.36-0.94)                      |                      |
| <b>BMI</b>                        |                                      |                                       |                                       | 0.027                |
| 18.5-23.9 kg/m <sup>2</sup>       | 1.00 (Ref.)                          | 0.74 (0.42-1.22)                      | 0.46 (0.23-0.84)                      |                      |
| 24.0-27.9 kg/m <sup>2</sup>       | 1.00 (Ref.)                          | 0.68 (0.45-0.99)                      | 0.60 (0.38-0.89)                      |                      |
| ≥ 28 kg/m <sup>2</sup>            | 1.00 (Ref.)                          | 0.90 (0.59-1.33)                      | 1.00 (0.67-1.45)                      |                      |
| <b>Smoking status</b>             |                                      |                                       |                                       | 0.016                |
| Non-smoker                        | 1.00 (Ref.)                          | 0.73 (0.54-0.97)                      | 0.59 (0.42-0.82)                      |                      |
| Smoker                            | 1.00 (Ref.)                          | 0.77 (0.49-1.18)                      | 0.88 (0.58-1.30)                      |                      |
| <b>Drinking status</b>            |                                      |                                       |                                       | 0.367                |
| Non-drinker                       | 1.00 (Ref.)                          | 0.65 (0.47-0.88)                      | 0.71 (0.52-0.95)                      |                      |
| Drinker                           | 1.00 (Ref.)                          | 0.96 (0.63-1.43)                      | 0.71 (0.43-1.12)                      |                      |
| <b>High-fat diet</b>              |                                      |                                       |                                       | 0.556                |
| No                                | 1.00 (Ref.)                          | 0.74 (0.55-0.97)                      | 0.73 (0.54-0.96)                      |                      |
| Yes                               | 1.00 (Ref.)                          | 0.78 (0.45-1.29)                      | 0.62 (0.34-1.06)                      |                      |
| <b>High-salt diet</b>             |                                      |                                       |                                       | 0.072                |
| No                                | 1.00 (Ref.)                          | 0.79 (0.59-1.03)                      | 0.62 (0.45-0.82)                      |                      |
| Yes                               | 1.00 (Ref.)                          | 0.62 (0.34-1.06)                      | 1.11 (0.66-1.79)                      |                      |
| <b>Vegetable and fruit intake</b> |                                      |                                       |                                       | 0.904                |
| Non-abundant                      | 1.00 (Ref.)                          | 0.77 (0.55-1.06)                      | 0.71 (0.50-0.98)                      |                      |
| Abundant                          | 1.00 (Ref.)                          | 0.71 (0.48-1.01)                      | 0.69 (0.46-1.01)                      |                      |

Full-adjusted model for age, gender, marital status, average monthly income, education level, smoking status, drinking status, physical activity, vegetable and fruit intake, high-fat diet, high-salt diet, BMI, energy intake, basal metabolic rate, family history of T2DM, weekly frequency of eating out

**Supplemental Table S3.** Stratified analysis of the association between dinner frequency and T2DM

| Variables                         | Dinner frequency                    |                                    |                                    | <i>P</i> interaction |
|-----------------------------------|-------------------------------------|------------------------------------|------------------------------------|----------------------|
|                                   | 7 times/week<br>( <i>n</i> =28,621) | 3-6 times/week<br>( <i>n</i> =463) | 0-2 times/week<br>( <i>n</i> =321) |                      |
| <b>Gender</b>                     |                                     |                                    |                                    | 0.852                |
| Men                               | 1.00 (Ref.)                         | 1.04 (0.56-1.79)                   | 0.11 (0.01-0.49)                   |                      |
| Women                             | 1.00 (Ref.)                         | 0.45 (0.22-0.81)                   | 0.71 (0.40-1.19)                   |                      |
| <b>Age</b>                        |                                     |                                    |                                    | 0.234                |
| < 60 years                        | 1.00 (Ref.)                         | 0.89 (0.51-1.43)                   | 0.48 (0.20-0.96)                   |                      |
| ≥ 60 years                        | 1.00 (Ref.)                         | 0.57 (0.24-1.17)                   | 0.61 (0.28-1.18)                   |                      |
| <b>BMI</b>                        |                                     |                                    |                                    | 0.117                |
| 18.5-23.9 kg/m <sup>2</sup>       | 1.00 (Ref.)                         | 0.29 (0.05-0.93)                   | 0.48 (0.11-1.32)                   |                      |
| 24.0-27.9 kg/m <sup>2</sup>       | 1.00 (Ref.)                         | 0.62 (0.29-1.16)                   | 0.44 (0.17-0.94)                   |                      |
| ≥ 28 kg/m <sup>2</sup>            | 1.00 (Ref.)                         | 0.94 (0.49-1.66)                   | 0.62 (0.25-1.28)                   |                      |
| <b>Smoking status</b>             |                                     |                                    |                                    | 0.783                |
| Non-smoker                        | 1.00 (Ref.)                         | 0.58 (0.33-0.95)                   | 0.57 (0.32-0.94)                   |                      |
| Smoker                            | 1.00 (Ref.)                         | 0.93 (0.41-1.86)                   | 0.23 (0.01-1.09)                   |                      |
| <b>Drinking status</b>            |                                     |                                    |                                    | 0.421                |
| Non-drinker                       | 1.00 (Ref.)                         | 0.45 (0.23-0.77)                   | 0.58 (0.32-0.95)                   |                      |
| Drinker                           | 1.00 (Ref.)                         | 1.26 (0.64-2.30)                   | 0.19 (0.01-0.89)                   |                      |
| <b>High-fat diet</b>              |                                     |                                    |                                    | 0.569                |
| No                                | 1.00 (Ref.)                         | 0.61 (0.36-0.95)                   | 0.49 (0.26-0.84)                   |                      |
| Yes                               | 1.00 (Ref.)                         | 0.88 (0.30-2.04)                   | 0.57 (0.14-1.60)                   |                      |
| <b>High-salt diet</b>             |                                     |                                    |                                    | 0.660                |
| No                                | 1.00 (Ref.)                         | 0.63 (0.37-0.99)                   | 0.56 (0.31-0.92)                   |                      |
| Yes                               | 1.00 (Ref.)                         | 0.80 (0.30-1.74)                   | 0.23 (0.01-1.08)                   |                      |
| <b>Vegetable and fruit intake</b> |                                     |                                    |                                    | 0.953                |
| Non-abundant                      | 1.00 (Ref.)                         | 0.55 (0.28-0.98)                   | 0.59 (0.29-1.09)                   |                      |
| Abundant                          | 1.00 (Ref.)                         | 0.77 (0.41-1.32)                   | 0.40 (0.15-0.84)                   |                      |

Full-adjusted model for age, gender, marital status, average monthly income, education level, smoking status, drinking status, physical activity, vegetable and fruit intake, high-fat diet, high-salt diet, BMI, energy intake, basal metabolic rate, family history of T2DM, weekly frequency of eating-out dinner

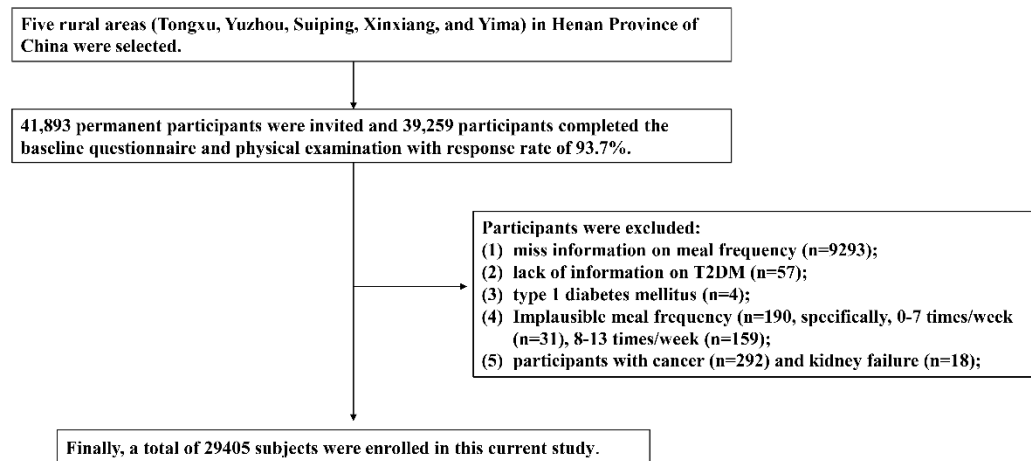

**Figure S1.** The flow chart for selecting study population
